1 **A high-content screen profiles cytotoxic microRNAs in pediatric and adult glioblastoma cells**  
2 **and identifies miR-1300 as a potent inducer of cytokinesis failure**

3

4 Marjorie Boissinot

5 Henry King

6 Matthew Adams

7 Julie Higgins

8 Thomas A. Ward

9 Lynette P. Steele

10 Daniel Tams

11 Ruth Morton

12 Euan Polson

13 Barbara da Silva

14 Alastair Droop

15 Josie L. Hayes

16 Heather Martin

17 Peter Laslo

18 Ewan Morrison

19 Darren C. Tomlinson

20 Heiko Wurdak

21 Jacquelyn Bond

22 Sean E. Lawler\*

23 Susan C. Short\*

24

25 1 Radiation Biology and Therapy Group, Leeds Institute of Medical Research, University of Leeds, St  
26 James's Hospital, LS9 7TF, Leeds, UK. (MB, HK, TAW, LPS, DT, RM, JLH, SCS)

27 2 Translational Neuro-Oncology Group, Leeds Institute of Medical Research, University of Leeds, St  
28 James's Hospital, LS9 7TF, Leeds, UK (MB, LPS, JLH, SEL)

29 3 BioScreening Technology Group, University of Leeds, St James's Hospital, LS9 7TF, Leeds, UK  
30 (MA, JH, JB, DCT)

31 4 Stem Cells and Brain Tumour Research Group, Leeds Institute of Medical Research, University of  
32 Leeds, St James's Hospital, LS9 7TF, Leeds, UK (EP, BDS, HW)

33 5 MRC Medical Bioinformatics Centre, University of Leeds, Clarendon Way, Leeds, LS2 9NL, UK  
34 (AD)

35 6 School of Molecular and Cellular Biology, Faculty of Biological Sciences, University of Leeds ,  
36 LS2 9JT, Leeds, UK. (HM, DCT)

37 7 Myeloid Differentiation Group, Leeds Institute of Medical Research, University of Leeds, St  
38 James's Hospital, LS9 7TF, Leeds, UK (PL)

39 8 Cell Biology Research Group, Leeds Institute of Medical Research, University of Leeds, St James's  
40 Hospital, LS9 7TF, Leeds, UK (EM)

41 9 Microcephaly and Neurogenesis Research Group, Leeds Institute of Medical Research, University  
42 of Leeds, St James's Hospital, LS9 7TF, Leeds, UK (JB)

43 10 Harvey Cushing Neurooncology Laboratories, Dept of Neurosurgery, Brigham and Women's  
44 Hospital, Harvard Medical School, Boston, MA02115, USA. (SEL)

45 11 St James's Institute of Oncology and Leeds Institute of Medical Research, University of Leeds, St  
46 James's Hospital, LS9 7TF, Leeds, UK. (SCS)

47

48 **Running Title (50 characters incl spaces)**

49 Profiling toxic microRNAs in glioblastoma cells

50 **\* Corresponding authors**

51 Prof Susan C. Short

52 Leeds institute for Medical Research

53 Wellcome Trust Brenner Building

54 Level 5

55 St James's University Hospital

56 Beckett Street

57 Leeds

58 LS9 7TF

59 United Kingdom

60 Tel: 0044 113 343 8434

61 Email: S.C.Short@leeds.ac.uk\*

62

63 Dr Sean E. Lawler

64 Assistant Professor

65 Harvey Cushing Neurooncology Laboratories

66 Department of Neurosurgery

67 Brigham and Women's Hospital

68 Building of Transformative Medicine (room 8016N)

69 60 Fenwood Road

70 Boston, MA 02115

71 Tel: (617) 525-5650

72 Email: SLAWLER@bwh.harvard.edu\*

73 <sup>1</sup>

---

<sup>1</sup> Since the beginning of the work described here, several post-docs and PhD students then involved have moved to different positions. Miss Julie Higgins retired. Dr Sean Lawler relocated to Boston.

74 **Funding**

75 This project was supported by the UK based charities Yorkshire Cancer Research (award L369 SEL,  
76 DCT), The Brain Tumour Charity (Program reference number 13/192 SCS), Candlelighters and Brain  
77 Tumour Research and Support Yorkshire (SEL).

78

79 **Conflict of Interest**

80 We declare that there is no conflict of interest.

81

82 **Authorship**

83 Conception and Design:

84 SEL and DCT

85 Development of Methodology:

86 MB SEL DCT SCS HW PL JB

87 Acquisition of data:

88 MA MB JB AD JLH JH HK RM LPS DT TW

89 Analysis and Interpretation:

90 MA MB JB AD JLH HK LPS EM HM

91 Writing, Review and/or revision of the manuscript:

92 MB, HK, SEL, SCS, HW, JB main text, figures and methods

93 all the other authors also contributed to specific parts corresponding to their involvement

94 All authors reviewed and approved manuscript

95

96 **Total word count (abstract, text, ref, figure legends): 6,447**

97 **Abstract (250 words max for Neuro-Onc)**

98 **Background:** MicroRNAs play an important role in the regulation of mRNA translation, and have  
99 therapeutic potential in cancer and other diseases. **Methods:** To profile the landscape of microRNAs  
100 with significant cytotoxicity in the context of glioblastoma (GBM), we performed a high-throughput  
101 screen using a synthetic oligonucleotide library representing all known human microRNAs in adult  
102 and pediatric GBM cells. Bio-informatics analysis were used to refine this list and the top seven  
103 microRNAs were validated in a larger panel of cells by flow-cytometry, and RTqPCR. The  
104 downstream mechanism of the strongest and most consistent candidate was investigated by siRNAs,  
105 3'UTR luciferase assays and Western Blotting. **Results:** Our screen identified ~100 significantly  
106 cytotoxic microRNAs with 70% concordance between cell lines. MicroRNA-1300 (miR-1300) was  
107 the most potent and robust candidate. We observed a striking binucleated phenotype in miR-1300  
108 expressing cells and characterized the mechanism of action as cytokinesis failure followed by  
109 apoptosis, which was observed in an extended GBM cell panel including two stem-like patient-  
110 derived cultures. We identified the physiological role of miR-1300 as a regulator of endomitosis in  
111 megakaryocyte differentiation where blockade of cytokinesis is an essential step. In glioblastoma  
112 cells, the oncogene Epithelial Cell Transforming 2 (ECT2) was validated as a direct key target of  
113 miR-1300. ECT2 siRNA phenocopied the effects of miR-1300, and its overexpression led to a  
114 significant rescue of miR-1300 induced binucleation. **Conclusion:** MiR-1300 was identified as a  
115 novel regulator of endomitosis with translatable potential for therapeutic application. The datasets  
116 will be a resource for the neuro-oncology community.

117

118 **Key words (up to five)**

119 MicroRNAs, Glioblastoma, miR-1300, cytokinesis failure, ECT2

120

121 **Key points (2 or 3 key points 85 characters plus spaces each)**

122 70% of cytotoxic microRNAs were shared between adult and pediatric glioblastoma cells

123 MiR-1300 expression is restricted to endomitosis within megakaryocyte differentiation

124 MiR-1300's ectopic expression is a potent and promising therapeutic tool in cancer

125

126 **Importance of Study (150 words or less)**

127

128 Previous functional studies of microRNAs involved in the regulation of glioblastoma cell proliferation  
129 and/or survival have focused on adult glioblastoma alone and are restricted to only a few microRNAs  
130 at a time. Our study provides the first encompassing landscape of potent cytotoxic microRNAs in  
131 pediatric and adult glioblastoma.

132 Not only, does our data provide an invaluable resource for the research community but it also revealed  
133 that 70% of microRNAs with significant cytotoxicity were shared by adult and pediatric cells.

134 Finally, we identified and characterized the previously undescribed role of microRNA-1300 in the  
135 tight regulation of megakaryocyte differentiation into platelets and how, when expressed outside of  
136 this context, miR-1300 consistently causes cytokinesis failure followed by apoptosis, and thus  
137 represents a powerful cytotoxic tool with potential for translation towards therapeutic applications.

138 **Introduction**

139 MicroRNAs are small 22-24nt single-stranded non-coding RNAs that function by reducing the  
140 translation of target mRNAs. In glioblastoma (GBM), they have been shown to play roles in  
141 proliferation, invasion and stemness, suggesting that microRNAs and their downstream pathways may  
142 represent potent therapeutic targets (1-6). There is an increasing number of microRNA mimics and  
143 inhibitors in pre-clinical and early clinical development in cancer, including one for patients with  
144 solid tumors using a mimic of microRNA-34 (MRX34, Mirna Therapeutics Inc., NCT01829971) (7-  
145 10). Recent pre-clinical studies showed efficacy of a microRNA expressing therapeutic vector in  
146 GBM (11). MicroRNA-10b expression has been measured in a clinical trial (NCT01849952) to assess  
147 its use as a prognostic and diagnostic biomarker. An inhibitor of miR-10b is also currently at the  
148 preclinical development stage (Regulus Therapeutics Inc. and (12)).

149 Current approaches for microRNA studies in GBM mainly involve endogenous microRNA expression  
150 profiles coupled with bioinformatic analysis and target identification to link the landscape of  
151 microRNA expression to GBM biology and disease outcome (13-15). Other functional studies have  
152 focused on small numbers of microRNAs and very few large scale functional studies have been  
153 performed in GBM (16).

154 To access the landscape of potential cytotoxic microRNAs in GBM we decided on a global approach  
155 by performing a large-scale functional screen. We used a microRNA mimic oligonucleotide library  
156 combined with a high-throughput imaging platform to identify microRNAs that significantly impaired  
157 proliferation and/or survival of GBM cells. This approach highlighted microRNA-1300 as a candidate  
158 for more detailed characterization. We found that ectopic expression of the mature form of miR-1300  
159 consistently caused a G2/M cell cycle arrest followed by apoptosis. Further validation showed that  
160 miR-1300 caused cytokinesis failure and the oncogene Epithelial Cell Transforming 2 (ECT2) was  
161 identified as one of the direct targets of miR-1300 involved in this phenotype. This, in turn, led us to  
162 identify the key physiological need for the finely tuned expression of miR-1300 during endomitosis in  
163 platelet formation from megakaryocytes (17-19). Taken together, our study not only provides an  
164 encompassing profile of cytotoxic microRNAs towards adult and pediatric GBM cells but also  
165 identifies miR-1300 as a uniquely specific tool with a potential therapeutic window for combination

166 with current standard therapy in GBM. Our dataset will provide a useful resource for other researchers  
167 in the field with an interest in the therapeutic application of microRNAs.

168

169 **Material and Methods:**

170 **Please see supplementary information for: cell lines details, bioinformatics analysis,**  
171 **immunofluorescence, flow-cytometry, qRTPCR, siRNA Knock-Down, Westernblotting,**

172 **Cell manipulations:**

173 *High-Throughput Screen:*

174 The miRIDIAN microRNA MIMIC library based on miRBase v16.0 was purchased from Dharmacon  
175 (GE Healthcare). All microRNA mimics and siRNAs were resuspended at a stock concentration of  
176 20 $\mu$ M in 1X siRNA Buffer prepared from a 5X stock (Cat# B-002000-UB-100, Dharmacon GE  
177 Healthcare) in RNase free water (Cat# B-003000-WB-100, Dharmacon GE Healthcare). The screen  
178 controls for cell number were MIMIC negative control #1 tagged with Dy547 (Cat# CP-004500-01-  
179 20) to calculate transfection efficiency as well as without Dy547 (Cat.# CN-001000-01-20) which  
180 were included in 8 separate wells and PLK-1 siRNA SMARTpool (Cat.# M-003290-01-005) which  
181 was the positive control for decreased cell number. Reverse transfection was performed on U251 and  
182 KNS42 cells using RNAiMAX lipofectamine (Invitrogen, Life Technologies, Cat# 13778-075),  
183 OPTI-MEM® I Reduced Serum Medium (Cat# 31985, Gibco™, Invitrogen corporation) and 100nM  
184 of RNA material (MIMIC or siRNA candidates and controls). For the screen, each well of a 96 well  
185 ViewPlate (6005182, Perkin Elmer), contained 20 $\mu$ l of transfection mix including: 0.1 $\mu$ l of  
186 RNAiMAX (137789-075, Life Technologies) commercial stock solution, 0.1 $\mu$ l of 20 $\mu$ M microRNA,  
187 and 19.8 $\mu$ l of OptiMEM® media (31985-047, Life Technologies); to which 80 $\mu$ l of growth media,  
188 containing 6 x10<sup>3</sup> cells/well (U251) or 9 x 10<sup>3</sup> cells/well (KNS42), were added giving a final  
189 volume of 100 $\mu$ l per well. Plates were placed at 37°C, 5% CO<sub>2</sub> for 72h prior to being fixed in 4%  
190 PFA and stained with DAPI (Cat# D1306, Life Technologies) for nuclei count, TOTO-3 (Cat# T-  
191 3604, Molecular Probes) and Phalloidin-A488 (Cat# A12379, Life Technologies) for delimitation of  
192 the cytoplasm and actin structure (See the “Immunofluorescence” section below for details).



193 Each 96 well plate contained one microRNA mimic or microRNA control per well. Plates were  
194 imaged on a Perkin-Elmer Operetta High Content Imaging System using Harmony 3.1 software, 3  
195 fluorescent channels, 10 fields/well with a 20x objective. For each cell line, the screen was performed  
196 in two separate passages of cells.

197 An algorithm for nuclei counting based on DAPI stain was designed in Columbus 2.4 analysis  
198 software. For the analysis, the mean cell number of 8 mimic negative control wells was evaluated per  
199 plate and used to calculate the Z-score (the number of standard deviations above or below the mean  
200 cell number) for each mimic microRNA utilized. Candidate microRNAs were identified as those  
201 which significantly decreased cell number due to reduced proliferation and/or cell survival only if  
202 their mean z-score was greater or equal to two standard deviations below the mean z-score of the  
203 negative controls for both biological replicates.

204

#### 205 *Induction of Endomitosis:*

206 Endomitosis was induced by culturing non-adherent CMK cells for up to 72h in presence of 5 $\mu$ M of  
207 the Src kinase inhibitor SU6656 (Sigma Aldrich) (20, 21). Six milliliters of cell suspension were  
208 harvested every day for three consecutive days. 2ml were used to prepare RNA (SU6656 experiments  
209 only), 2ml to prepare protein lysates for ECT2 western blot, and 2ml were used for imaging.

210

#### 211 *Forced differentiation of Glioma stem-cells*

212 Glioma stem cells were differentiated in the presence of 100ng/ml BMP4 (22-24) (Life Technologies)  
213 for 4-5 days prior to transfection with mimic miRNA-1300 or scrambled control. Cells were  
214 maintained in BMP4 supplemented media following transfection.

215

#### 216 **3'UTR target validation assays:**

217 The 3'UTR reporter assay was performed using Luc-Pair miR Luciferase Assay Kit (Genecopoeia) as  
218 per manufacturer's instructions. Briefly, 9000 cells were seeded per well into a white 96 well plate.

219 The cells were reverse transfected with 1  $\mu$ g miRNA (scramble of miR1300) and 1  $\mu$ g reporter

220 plasmid (Control vector CmiT000001-MT01, *ECT2* 3'UTR-WT wild type HmiT064169-MT01,  
221 *ECT2* 3'UTR-mt mutant containing a custom two base pair “mutation” turning the human miR-1300  
222 binding site into the *Mus musculus* miR-1300 seed sequence CS-HmiT064169-MT01-01,  
223 Genecopoeia). At 72 h post transfection (120 h in GBM4) the media was removed and luminescence  
224 was measured on a Borthold Mithras LB 940 plate reader.

225

#### 226 **ECT2 rescue**

227 Reverse transfection of KNS42 cells (9000 cells per well in a 96 well Perkin Elmer ViewPlate, Cat#  
228 6005182) with miR-1300 or scrambled control was performed as outlined above (High throughput  
229 screen). After 36 hours incubation cells were transfected with 1  $\mu$ g of either control vector or a vector  
230 containing *ECT2* lacking the 3'UTR region (*ECT2*- $\Delta$ 3'UTR) using lipofectamine (EX-NEG-Lv105  
231 and EX-T7673 Lv105 respectively, both from Genecopoeia). At 72h post miRNA transfection the  
232 cells were fixed with 4% PFA and stained as outlined in the high-throughput screen. The time point at  
233 36h post transfection with miR-1300 prior to *ECT2* rescue was chosen to allow for the G2/M block to  
234 take place without the cells being beyond rescue by being too engaged in apoptosis. In GBM1 cells  
235 *ECT2* rescue experiments the time course was extended to reflect the difference in growth rate and  
236 kinetics of the miR-1300 phenotype; transfection with *ECT2*- $\Delta$ 3'UTR took place at ~60 h and fixing  
237 at 120 h.

238

239

#### 240 **Sample size and statistical analysis:**

241 With the exception of the high-throughput screen, all assays were performed as three biological  
242 replicates (cells from different passage number), each containing three technical replicates (three  
243 individual wells receiving the same treatment). In the case of immunofluorescent imaging analysis, a  
244 minimum of 100 cells per condition were scored. The unequal variance Welch, unpaired t test was  
245 chosen to test how far apart the two populations tested were regardless of the difference in their  
246 standard deviation (for example: microRNA-1300 vs control).

247

248 **Data Availability:**

249 The raw data from the screen are supplied in the supplementary information as individual Excel files.

250

251 **Results and Discussion**

252 **A high-throughput screen identifies microRNAs with cytotoxic activity in GBM**

253 We profiled cytotoxic microRNAs in adult and pediatric GBM cells using a high-throughput high-  
254 content gain-of-function screen based on a library that encompassed mimics of the mature form of all  
255 annotated microRNAs based on miRBase v16.0 at the time. The screen was performed in two  
256 established GBM cell lines: U251 (adult GBM) and KNS42 (pediatric GBM). A schematic of the  
257 screen is shown in Suppl. Figure 1. The chosen primary end-point read out was a decrease in cell  
258 number assessed by automated nuclei counting at 72 hours post-transfection.

259 The candidate hit list for KNS42 and U251 cells contained 83 and 304 such candidate hits,  
260 respectively (see Suppl. Tables 2 and 3 for the complete screen datasets). The U251 list was re-  
261 analyzed using a  $<-3$  Standard Deviation cut-off, which gave 111 hits to consider for further analysis.  
262 Based on the z-score analysis, we initially observed a 70% overlap between the candidate lists for  
263 each cell line (Suppl. Table 1) and focused further investigations on those microRNAs. We first  
264 utilized the online microRNA databases miRBase (25-29) and Targetscan (30-36), as well as PubMed  
265 (National Center for Biotechnology Information, National Library of Medicine, Bethesda MD, USA)  
266 to gather available information for each of the 'hit' microRNAs: chromosomal location, main  
267 validated and predicted target genes, associated functions and role in disease. This approach  
268 allowed us to shortlist 18 candidate microRNAs. The second level of analysis took into consideration  
269 the strength of the z-score, together with information focused on seed sequence family, the association  
270 of the target genes with cell proliferation and/or cell death, led to the selection of seven of those  
271 eighteen microRNAs for validation in cell based assays. We applied the conditions of the primary  
272 screen to a panel of four established GBM cell lines (U251, KNS42, LN229 and U373), this  
273 confirmed a statistically significant cytotoxicity following transfection of all seven mimic-microRNA  
274 candidates (Suppl. Figure 2A).

275 In order to investigate whether the reduced cell number was due to programmed cell death, we  
276 analyzed expression of cleaved caspase-3 by immunofluorescence. Interestingly, only transfection  
277 with the mimic for miR-1300 led to the cleavage of caspase-3 and cell death by apoptosis (Suppl.  
278 Figure 2B and 2C).

279 We then focused further on characterizing the role and mechanism of action of miR-1300; its high z-  
280 scores (z-score=-2.98 in KNS42 and z-score=-5.14 in U251), and its ability to induce apoptosis  
281 making it the most promising and interesting candidate. MiR-1300 mature and precursor sequences as  
282 well as alignment to the human genome can be found in supplementary Table 4.

283

### 284 **MiR-1300 induces cytokinesis failure, cell cycle arrest and apoptosis in GBM cell lines and** 285 **patient-derived GBM**

286 Flow cytometry-based assays were used to measure the effect of ectopic expression of miR-1300 in its  
287 mature form (MIMIC) on cell cycle and cell death over time. Expression of miR-1300 induced a  
288 significant block of the cell cycle in G2/M at 24 hours in U251 and 48 hours in KNS42 cells (Figure  
289 1A), rapidly followed by the onset of apoptosis (Figure 1B). In U251 cells there was a >60%  
290 reduction in cells in G0/G1 with a 1.5-fold increase in G2/M cells at 24 hours compared to the  
291 scrambled control (p=0.079\*\*). This G2/M arrest became more pronounced at 48 hours (~2.5-fold  
292 change, p<0.0335\*) and 72 hours (3-fold change, p<0.0485\*) but was no longer apparent at 96h  
293 following high levels of apoptosis (Figure 1C >20% reduction in the number of live cells and ~3 and  
294 6-fold increase of cells in early-mid and mid-late apoptosis (p=0.0012\*\* and p<0.0001\*\*\*\*,  
295 respectively). Similar changes in the cell cycle profile were observed in KNS42 cells with a ~4- and  
296 ~3-fold increase in cells in G2/M at 48 and 72 hours (p=0.017\* and p=0.009\*\*, respectively). To  
297 further evaluate this effect, we analyzed images of fluorescently stained cells from the screen, which  
298 suggested that the cell cycle arrest observed by flow-cytometry occurred during mitosis (Figure 1C).  
299 We then formally re-evaluated binucleation in these cells and showed that 72 hours post-transfection,  
300 ectopic expression of miR-1300 caused approximately 80% and >60% increase in binucleated cells in  
301 U251 and KNS42, respectively (p<0.0001\*\*\*\*, in both cases). The same phenotype was observed in  
302 LN229 and U373 GBM cell lines (Suppl. Figure 3). The two nuclei per cell which we observed

303 (Figure 1C) suggested that cell cycle arrest took place after telophase and is representative of  
304 cytokinesis failure. Live cell imaging confirmed that both KNS42 (Suppl. Movie 1A, link in  
305 additional file) and U251 cells (Suppl. Movie 1B, link in additional file) transfected with miR-1300  
306 initiated mitosis normally but failed to complete the final stages of cytokinesis resulting in the  
307 formation of binucleated cells.

308 Next, we sought to confirm that this phenotype was also observed in patient-derived glioma stem-like  
309 cells (GSCs) as a more representative *in vitro* model. We used two previously characterized GSCs,  
310 GBM1 and GBM4 (23, 24) and performed new time courses for the flow cytometry assays at 72, 96  
311 and 120 hours to reflect the slower division rate of the patient-derived cells, and we repeated the  
312 imaging experiments with binucleation scoring at 96 hours. Transfection of GBM1 with mimic miR-  
313 1300 caused a profound G2/M phase block with a 4-fold increase in the proportion of cells in G2/M  
314 phase at 72, 96 and 120 hours compared to cells transfected with the scrambled-mimic control (Figure  
315 2A). Transfection with mimic miR-1300 also caused a 2-fold reduction in the number of cells in  
316 G0/G1 and S phase (Figure 2A). This G2/M arrest led to an overall reduction in live cells of  
317 approximately 40%, 45% and 80% at 72, 96 and 120 hours and a significant increase ( $p < 0.01$  and  
318  $p < 0.05$  in GBM1 and GBM4 respectively) in apoptotic cells at 120 hours (Figure 2B). Similar results  
319 were observed in GBM4 GSCs with miR-1300 causing a 65% reduction in cells in S-phase at 72  
320 hours which was maintained at 96 hours. At 96 hours there was an increase in cells on G2/M phase by  
321 4-fold for GBM1 and by 2-fold for GBM4 (Figure 2A). At 96 hours, miR-1300 transfection resulted  
322 in an approximately 40% reduction in live cells and an increase of around 20% in early-mid apoptotic  
323 GBM1 cells. By 120 hours there was an approximately 75% decrease in live cells and a 1.5-fold  
324 increase in early-mid apoptotic for both GBM1 and GBM4 and 2.5 and 1.5-fold increase in mid-late  
325 apoptotic cells for GBM1 and GBM4 respectively (figure 2B). Figures 2C and D show the effect of  
326 miR-1300 on the number of bi- and multi-nucleated cells. As with the established cell lines, miR-1300  
327 caused a decrease in mono-nucleated cells of approximately 90% in both GBM1 and GBM4 and a  
328 significant increase (approximately 50%) in bi-nucleated cells for both GSCs, ( $p = 0.0055^{**}$  and  
329  $p = 0.0081^{**}$ , respectively).

330 Taken together, this initial characterization showed that ectopic expression of miR-1300 consistently  
331 led to failure of cytokinesis, measured by cell cycle arrest in G2/M phase and manifested by a striking  
332 binucleated phenotype followed by the onset of apoptosis as documented by caspase-3 cleavage  
333 (Suppl. Figure 2B/C) and expression of AnnexinV/PI (Figures 1B and 2B). This was confirmed both  
334 in established GBM cell lines and in patient-derived GBM cultures.

335

### 336 **Identification of miR-1300 target genes**

337 Since there are no validated target genes for miR-1300, we used the list of predicted targets extracted  
338 from the online database TargetScan v5.2 (34). This contains 3327 target genes predicted to be  
339 targeted by miR-1300 irrespective of the presence of conserved sites (the seed sequence for miR-1300  
340 is poorly conserved across species). We then loaded this list in the Metacore gene analysis software  
341 (Thomson Reuters) and cross-referenced it using AmiGO (37) for “cytokinesis” as a Gene Ontology  
342 term. This allowed us to identify which of the miR-1300 target genes had the highest potential  
343 involvement in the observed cytokinesis failure. Our analysis gave a list of 21 potential target genes  
344 (Suppl. Table 5). Based on the characteristic binucleation seen in our phenotype, the Targetscan  
345 prediction score, and the literature, we chose the guanine nucleotide exchange factor (GEF) *ECT2*  
346 (*Epithelial Cell Transforming 2*) as our target of interest for initial validation. Interestingly, *ECT2* has  
347 been previously described as an oncogene and has been shown to contribute to the invasive behavior  
348 of GBM cells (38-42). *ECT2* plays a crucial role in cytokinesis through activation of the small  
349 GTPase RhoA, a key protein in the formation of the mitotic cleavage furrow during cytokinesis (17,  
350 18). It has also been shown that treatment of cells with RhoA inhibitors caused a binucleated  
351 phenotype similar to that observed in the GBM cell lines following transfection with miR-1300 (43).  
352 Further, *ECT2* depletion has been shown to lead to cytokinesis failure by impairment of cleavage-  
353 furrow formation (44).

354 Using Real-Time qPCR in a panel of five patient-derived stem-like GBM cell cultures, we observed  
355 an inverse relation between *ECT2* mRNA and miR-1300 expression (Suppl. Figure 4A). This is  
356 consistent with the frequency of multinuclear cells observed during cell culture (Suppl. Figure 4B).

357 Together, this data implicates *ECT2* as a miR-1300 target that may play a role in mediating its effects  
358 on glioblastoma cells.

### 359 ***ECT2* is a direct target of miR-1300**

360 In order to validate *ECT2* as a direct target of miR-1300, we first transfected U251 and KNS42 cells  
361 with siRNAs directed against *ECT2* (~95% reduction in U251 and ~80% reduction in KNS42 (Figure  
362 3D and Suppl. Figure 5B)). Figures 3A and 3B show that *ECT2* siRNA replicated the binucleated  
363 phenotype induced by miR-1300 at an equivalent 72 hours' time point previously observed for mimic  
364 miR-1300. Transfection of U251 with miR-1300 caused approximately 30% and 7% increase in bi-  
365 and multi-nuclear cells respectively. Consistent with identification of *ECT2* as a miR-1300 target  
366 transfection with miR-1300 induced a decrease in the expression of *ECT2* of approximately 70% and  
367 50% in U251 and KNS42 cells respectively (Figure 3C and Suppl. Figure 5A); siRNA mediated  
368 knock-down of *ECT2* caused an increase in bi- and multi-nucleated cells of approximately 40% and  
369 15%, respectively. A similar trend was observed in KNS42 cells (Figure 3A and 3B). In addition,  
370 Western blotting experiments confirmed that transfection with miR-1300 induces a decrease in the  
371 expression of *ECT2* of approximately 70% and 50% in U251 and KNS42 cells, respectively (Figure  
372 3C and Suppl. Figure 5A). Experiments in the patient-derived GSCs produced the same result (Suppl.  
373 Figure 6). We did observe structural differences in actin and tubulin between miR-1300 expressing  
374 and *ECT2* knock-down cells by immunofluorescence (Figure 3B). This indicates that other miR1300  
375 target genes, likely from the list of 21 targets we previously identified (Suppl. Table 5), are involved  
376 in its downstream phenotype.

377 Having shown that the miR-1300 phenotype is consistent amongst a range of established and patient-  
378 derived GBM lines and that *ECT2* is a promising target of miR-1300 across all cell lines tested, we  
379 went on to confirm direct targeting using 3'UTR reporter assays in the established KNS42 cell line  
380 and one patient-derived GSC culture (GBM4). Cells were transfected with a luciferase reporter  
381 containing either the wild type *ECT2* 3'UTR (3'*ECT2*) region or a mutated version of the *ECT2*  
382 3'UTR (3'*ECT2*-mt) harboring two point mutations in the predicted miR-1300 seed region (see  
383 Methods). Co-transfection of either KNS42 or GBM4 with miR-1300 and 3'*ECT2* caused a  
384 significant reduction in reporter signal in both KNS42 and GBM4 cells (Figure 4A and B,

385 respectively). In cells transfected with 3'ECT2-mt the effect of miR-1300 on the reporter signal was  
386 abolished thus showing that the *ECT2* 3'UTR is a direct target of miR-1300 (Figure 4A and B,  
387 respectively).

388 In order to further validate the involvement of *ECT2* in the pathway downstream of miR-1300, we  
389 performed rescue experiments as follows; 36 hours following transfection with miR-1300 in KNS42  
390 cells (~60h in GBM1 cells), cells were transfected again with an expression vector for *ECT2* (lacking  
391 the 3'UTR region) in an attempt to rescue cells from cytokinesis failure. We showed that re-  
392 expression of *ECT2* caused a 50% reduction in the number of binucleated cells in both KNS42 and  
393 GBM1 cells (Figure 4 C and D). Overall these data confirm that the effect of miR-1300 expression is  
394 mediated via reduced *ECT2* levels, which drive failed cytokinesis and apoptosis in glioma cells.

395

#### 396 **miR-1300 and *ECT2* as regulator of endomitosis**

397 Endogenous levels of *ECT2* mRNA and protein are known to be decreased during megakaryocytic  
398 differentiation at the endomitotic stage when multinucleation occurs (19). This suggests a likely  
399 regulatory role for miR-1300 on *ECT2* expression levels in platelet formation which is supported by  
400 low levels of miR-1300 remaining in platelets post-terminal differentiation (see supplementary data of  
401 ref 15) (19, 45). Using the megakaryocytic cell line CMK (21) and the Src inhibitor SU6656 which  
402 has been shown to induce endomitosis and differentiation of CMK cells into platelets (20, 21), we  
403 have now confirmed these findings and used this model of induced endomitosis to validate this  
404 previously undescribed physiological role of miR-1300. We measured a time dependent increase in  
405 expression of endogenous microRNA-1300 in CMK cells by approximately 4-fold at 48h, and  
406 approximately 6-fold at 72h and a concomitant decrease in *ECT2* protein levels following exposure to  
407 5 $\mu$ M SU6656 (Figure 5A and suppl. Figure 7). Moreover, we confirmed the increase of polyploid  
408 megakaryocytic cells by nearly 2-fold at 24h, and 1.5- fold both at 48h and 72h respectively, using  
409 high-content immunofluorescence imaging (Figure 5B).

410

#### 411 **Differentiated brain tumor cells are not affected by miR-1300 expression**



412 In order to establish whether the phenotype caused by miR-1300 was specific to glioma cells, we  
413 assessed the effect of its ectopic expression on fully differentiated GSCs, compared to their stem-like,  
414 proliferative (isogenic) counterparts. Differentiation of GBM1 and GBM4 cells was achieved by 5  
415 days exposure to BMP4 as previously described (22-24, 46, 47).

416 In GBM1 cells, transfection with miR-1300 caused a 4-fold increase in the proportion of cells in  
417 G2/M phase, which was significantly reduced by 2.3-fold in the BMP4 differentiated counterparts  
418 (Figure 6A). In addition, miR-1300 caused a 1.5-fold reduction in live cell numbers, a 3.8-fold  
419 increase in early apoptotic cells and a 14-fold increase in apoptotic cells, whereas there was no  
420 significant change in their differentiated counterparts (Figure 6B). We also observed a reduction by  
421 half in the number of binucleated cells in BMP4 differentiated GSCs compared to non-differentiated  
422 cells. GBM4 cells showed a 0.8-fold increase in cells in G2/M after transfection with miR-1300,  
423 which was reduced to a 0.2-fold after BMP4 treatment (Figure 6A). MiR-1300 caused a 50%  
424 reduction in live GBM4 cells and a 3.8 and 4-fold increase in early-mid apoptotic and mid-late  
425 apoptotic cells, respectively. However, cell death was significantly reduced in BMP4 treated post  
426 mitotic GBM4 cells transfected with miR-1300, to the point where there were no significant  
427 differences in comparison with the scrambled control transfected cells (Figure 6B). In addition, BMP4  
428 treated GBM4 cells did not show an increased number of binucleated cells compared to control cells,  
429 as opposed to their non-differentiated counterparts (Figure 7B). Taken together these data suggest that  
430 expression of miR-1300 in non-proliferating, differentiated cells does not induce significant cell cycle  
431 arrest or apoptosis when compared to proliferating, undifferentiated (stem-like) isogenic pairs. This  
432 suggests that miR-1300 could represent an attractive target with a favorable therapeutic ratio in  
433 glioma.

#### 434 **Conclusions**

435 Our high-throughput screen defined the landscape of microRNAs with significant cytotoxic effects in  
436 adult and pediatric GBM cell lines.

437 We have shown that ectopic expression of miR-1300, the most potent candidate highlighted by the  
438 screen, leads to cytokinesis failure followed by apoptosis in both established and in patient-derived

439 GBM cells, importantly, without affecting terminally differentiated glioma cells. Finally, we have  
440 validated ECT2 as one of the direct effectors downstream of miR-1300.

441 The effect of miR-1300 shows its translational potential as a treatment for GBM. It also makes it a  
442 very promising candidate for combination therapy as a chemo-radiosensitizer decreasing the ability of  
443 dividing cells to recover from the damage induced by conventional therapy. Moreover, this effect  
444 could be of paramount use in the second line of treatment where by specifically targeting resistant  
445 repopulating cells it could also significantly impair recurrence.

446 Ongoing work is aimed at validating the mechanism of action of miR-1300 in more detail as well as  
447 addressing delivery of microRNAs for brain tumor treatment and its potential use in combination with  
448 conventional treatments.

449

450

#### 451 **Funding**

452 This project was supported by the UK based charities Yorkshire Cancer Research (award L369 SEL,  
453 DCT), The Brain Tumour Charity (Program reference number 13/192 SCS), Candlelighters and Brain  
454 Tumour Research and Support Yorkshire (SEL).

455

456

457

#### 458 **Acknowledgements:**

459 Dr Adam Davison and Miss Liz Straszynski from the Flow-Cytometry and Imaging Facility provided  
460 training, advice and analysis support for all confocal microscopy and flow-cytometry based assays.

461 Dr Claire Taylor authenticated the cell lines. Miss Christina Ndidi Efua Okafor performed a review of  
462 the literature. Dr Georgia Mavria provided support and guidance in the writing of the manuscript and  
463 interpretation of the cytokinesis data.

464

#### 465 **List of abbreviations:**

466 GBM: Glioblastoma

467 GSC: Glioblastoma Stem Cell  
468 An: AnnexinV-FITC  
469 PI: Propidium Iodide  
470 Scbl: Scramble (non-targeting) microRNA control  
471 GEF: GTP Exchange Factor  
472 *ECT2*: Epithelial Cell Transforming 2  
473 miR-1300: mimic microRNA-1300  
474 ORF: Open Reading Frame  
475 GO: Gene Ontology  
476 MKB: megakaryoblast  
477 MKC: Megakaryocyte

478  
479

480 **References:**

- 481 1. Katsushima K, Kondo Y. Non-coding RNAs as epigenetic regulator of glioma stem-like cell  
482 differentiation. *Front Genet.* 2014;5:14.
- 483 2. Brower JV, Clark PA, Lyon W, Kuo JS. MicroRNAs in cancer: glioblastoma and glioblastoma  
484 cancer stem cells. *Neurochem Int.* 2014;77:68-77.
- 485 3. Sana J, Hajduch M, Michalek J, Vyzula R, Slaby O. MicroRNAs and glioblastoma: roles in core  
486 signalling pathways and potential clinical implications. *J Cell Mol Med.* 2011;15(8):1636-44.
- 487 4. Ahir BK, Ozer H, Engelhard HH, Lakka SS. MicroRNAs in glioblastoma pathogenesis and  
488 therapy: A comprehensive review. *Crit Rev Oncol Hematol.* 2017;120:22-33.
- 489 5. Banelli B, Forlani A, Allemanni G, Morabito A, Pistillo MP, Romani M. MicroRNA in  
490 Glioblastoma: An Overview. *Int J Genomics.* 2017;2017:7639084.
- 491 6. Mercatelli N, Galardi S, Ciafre SA. MicroRNAs as Multifaceted Players in Glioblastoma  
492 Multiforme. *Int Rev Cell Mol Biol.* 2017;333:269-323.
- 493 7. Godlewski J, Newton HB, ChioCCA EA, Lawler SE. MicroRNAs and glioblastoma; the stem cell  
494 connection. *Cell death and differentiation.* 2010;17(2):221-8.
- 495 8. Hayes J, Peruzzi PP, Lawler S. MicroRNAs in cancer: biomarkers, functions and therapy.  
496 *Trends in molecular medicine.* 2014;20(8):460-9.
- 497 9. Li Z, Rana TM. Therapeutic targeting of microRNAs: current status and future challenges.  
498 *Nature reviews Drug discovery.* 2014;13(8):622-38.
- 499 10. Chen L, Kang C. miRNA interventions serve as 'magic bullets' in the reversal of glioblastoma  
500 hallmarks. *Oncotarget.* 2015;6(36):38628-42.
- 501 11. Bhaskaran V, Nowicki MO, Idriss M, Jimenez MA, Lugli G, Hayes JL, et al. The functional  
502 synergism of microRNA clustering provides therapeutically relevant epigenetic interference in  
503 glioblastoma. *Nat Commun.* 2019;10(1):442.

- 504 12. Krichevsky AM, Uhlmann EJ. Oligonucleotide Therapeutics as a New Class of Drugs for  
505 Malignant Brain Tumors: Targeting mRNAs, Regulatory RNAs, Mutations, Combinations, and Beyond.  
506 Neurotherapeutics. 2019.
- 507 13. LeBlanc VC, Morin P. Exploring miRNA-Associated Signatures with Diagnostic Relevance in  
508 Glioblastoma Multiforme and Breast Cancer Patients. *J Clin Med*. 2015;4(8):1612-30.
- 509 14. Westphal M, Lamszus K. Circulating biomarkers for gliomas. *Nat Rev Neurol*.  
510 2015;11(10):556-66.
- 511 15. Moskwa P, Zinn PO, Choi YE, Shukla SA, Fendler W, Chen CC, et al. A functional screen  
512 identifies miRs that induce radioresistance in glioblastomas. *Molecular cancer research : MCR*.  
513 2014;12(12):1767-78.
- 514 16. Eulalio A, Mano M. MicroRNA Screening and the Quest for Biologically Relevant Targets. *J*  
515 *Biomol Screen*. 2015;20(8):1003-17.
- 516 17. Bastos RN, Penate X, Bates M, Hammond D, Barr FA. CYK4 inhibits Rac1-dependent PAK1  
517 and ARHGEF7 effector pathways during cytokinesis. *The Journal of cell biology*. 2012;198(5):865-80.
- 518 18. Su KC, Takaki T, Petronczki M. Targeting of the RhoGEF Ect2 to the equatorial membrane  
519 controls cleavage furrow formation during cytokinesis. *Developmental cell*. 2011;21(6):1104-15.
- 520 19. Gao Y, Smith E, Ker E, Campbell P, Cheng EC, Zou S, et al. Role of RhoA-specific guanine  
521 exchange factors in regulation of endomitosis in megakaryocytes. *Developmental cell*.  
522 2012;22(3):573-84.
- 523 20. Lannutti BJ, Blake N, Gandhi MJ, Reems JA, Drachman JG. Induction of polyploidization in  
524 leukemic cell lines and primary bone marrow by Src kinase inhibitor SU6656. *Blood*.  
525 2005;105(10):3875-8.
- 526 21. Wen Q, Goldenson B, Silver SJ, Schenone M, Dancik V, Huang Z, et al. Identification of  
527 regulators of polyploidization presents therapeutic targets for treatment of AMKL. *Cell*.  
528 2012;150(3):575-89.
- 529 22. King HO, Brend T, Payne HL, Wright A, Ward TA, Patel K, et al. RAD51 Is a Selective DNA  
530 Repair Target to Radiosensitize Glioma Stem Cells. *Stem Cell Reports*. 2017;8(1):125-39.
- 531 23. Polson ES, Kuchler VB, Abbosh C, Ross EM, Mathew RK, Beard HA, et al. KHS101 disrupts  
532 energy metabolism in human glioblastoma cells and reduces tumor growth in mice. *Sci Transl Med*.  
533 2018;10(454).
- 534 24. Wurdak H, Zhu S, Romero A, Lorgier M, Watson J, Chiang CY, et al. An RNAi screen identifies  
535 TRRAP as a regulator of brain tumor-initiating cell differentiation. *Cell Stem Cell*. 2010;6(1):37-47.
- 536 25. Griffiths-Jones S. The microRNA Registry. *Nucleic Acids Res*. 2004;32(Database issue):D109-  
537 11.
- 538 26. Griffiths-Jones S, Grocock RJ, van Dongen S, Bateman A, Enright AJ. miRBase: microRNA  
539 sequences, targets and gene nomenclature. *Nucleic Acids Res*. 2006;34(Database issue):D140-4.
- 540 27. Griffiths-Jones S, Saini HK, van Dongen S, Enright AJ. miRBase: tools for microRNA genomics.  
541 *Nucleic Acids Res*. 2008;36(Database issue):D154-8.
- 542 28. Kozomara A, Griffiths-Jones S. miRBase: integrating microRNA annotation and deep-  
543 sequencing data. *Nucleic Acids Res*. 2011;39(Database issue):D152-7.
- 544 29. Kozomara A, Griffiths-Jones S. miRBase: annotating high confidence microRNAs using deep  
545 sequencing data. *Nucleic Acids Res*. 2014;42(Database issue):D68-73.
- 546 30. Agarwal V, Bell GW, Nam JW, Bartel DP. Predicting effective microRNA target sites in  
547 mammalian mRNAs. *Elife*. 2015;4.
- 548 31. Friedman RC, Farh KK, Burge CB, Bartel DP. Most mammalian mRNAs are conserved targets  
549 of microRNAs. *Genome Res*. 2009;19(1):92-105.
- 550 32. Garcia DM, Baek D, Shin C, Bell GW, Grimson A, Bartel DP. Weak seed-pairing stability and  
551 high target-site abundance decrease the proficiency of Isy-6 and other microRNAs. *Nat Struct Mol*  
552 *Biol*. 2011;18(10):1139-46.
- 553 33. Grimson A, Farh KK, Johnston WK, Garrett-Engele P, Lim LP, Bartel DP. MicroRNA targeting  
554 specificity in mammals: determinants beyond seed pairing. *Mol Cell*. 2007;27(1):91-105.

- 555 34. Lewis BP, Burge CB, Bartel DP. Conserved seed pairing, often flanked by adenosines,  
556 indicates that thousands of human genes are microRNA targets. *Cell*. 2005;120(1):15-20.
- 557 35. Nam JW, Rissland OS, Koppstein D, Abreu-Goodger C, Jan CH, Agarwal V, et al. Global  
558 analyses of the effect of different cellular contexts on microRNA targeting. *Mol Cell*.  
559 2014;53(6):1031-43.
- 560 36. Shin C, Nam JW, Farh KK, Chiang HR, Shkumatava A, Bartel DP. Expanding the microRNA  
561 targeting code: functional sites with centered pairing. *Mol Cell*. 2010;38(6):789-802.
- 562 37. Carbon S, Ireland A, Mungall CJ, Shu S, Marshall B, Lewis S, et al. AmiGO: online access to  
563 ontology and annotation data. *Bioinformatics*. 2009;25(2):288-9.
- 564 38. Fields AP, Justilien V. The guanine nucleotide exchange factor (GEF) Ect2 is an oncogene in  
565 human cancer. *Advances in enzyme regulation*. 2010;50(1):190-200.
- 566 39. Fortin SP, Ennis MJ, Schumacher CA, Zylstra-Diegel CR, Williams BO, Ross JT, et al. Cdc42 and  
567 the guanine nucleotide exchange factors Ect2 and trio mediate Fn14-induced migration and invasion  
568 of glioblastoma cells. *Molecular cancer research : MCR*. 2012;10(7):958-68.
- 569 40. Salhia B, Tran NL, Chan A, Wolf A, Nakada M, Rutka F, et al. The guanine nucleotide  
570 exchange factors trio, Ect2, and Vav3 mediate the invasive behavior of glioblastoma. *The American  
571 journal of pathology*. 2008;173(6):1828-38.
- 572 41. Normand G, King RW. Understanding cytokinesis failure. *Advances in experimental medicine  
573 and biology*. 2010;676:27-55.
- 574 42. Sano M, Genkai N, Yajima N, Tsuchiya N, Homma J, Tanaka R, et al. Expression level of ECT2  
575 proto-oncogene correlates with prognosis in glioma patients. *Oncol Rep*. 2006;16(5):1093-8.
- 576 43. Castoreno AB, Smurnyy Y, Torres AD, Vokes MS, Jones TR, Carpenter AE, et al. Small  
577 molecules discovered in a pathway screen target the Rho pathway in cytokinesis. *Nature chemical  
578 biology*. 2010;6(6):457-63.
- 579 44. Chalamalasetty RB, Hummer S, Nigg EA, Sillje HH. Influence of human Ect2 depletion and  
580 overexpression on cleavage furrow formation and abscission. *J Cell Sci*. 2006;119(Pt 14):3008-19.
- 581 45. Nagalla S, Shaw C, Kong X, Kondkar AA, Edelstein LC, Ma L, et al. Platelet microRNA-mRNA  
582 coexpression profiles correlate with platelet reactivity. *Blood*. 2011;117(19):5189-97.
- 583 46. Piccirillo SG, Reynolds BA, Zanetti N, Lamorte G, Binda E, Broggi G, et al. Bone  
584 morphogenetic proteins inhibit the tumorigenic potential of human brain tumour-initiating cells.  
585 *Nature*. 2006;444(7120):761-5.
- 586 47. Suva ML, Rheinbay E, Gillespie SM, Patel AP, Wakimoto H, Rabkin SD, et al. Reconstructing  
587 and reprogramming the tumor-propagating potential of glioblastoma stem-like cells. *Cell*.  
588 2014;157(3):580-94.

589

## 590 **Figure Captions**

591 Figure 1: Effect of miR-1300 expression on proliferation and cell death in U251 and KNS42 cell lines

592 **a:** Cell cycle time course analyzed by flow cytometry using propidium iodide (PI) loading as a  
593 measure of DNA content. **b:** Cell death measured by flow cytometry where Annexin negative (An -)/  
594 PI negative (PI-) = live cells, An+ PI- = early-mid apoptotic cells, An+ PI+ = mid-late apoptotic cells  
595 and An- PI+ = Necrotic cells. **c:** Binucleation phenotype scoring following staining with DAPI and  
596 Phalloidin Alexafluor488 (Actin) and the corresponding representative image. All experiments were

597 performed in triplicate. Results are normalized to a scrambled mimic control. Statistical significance  
598 is expressed as follows: \* =  $p < 0.05$ , \*\* =  $p < 0.01$ , \*\*\* =  $p < 0.001$  and \*\*\*\* =  $p < 0.0001$ .

599

600 Figure 2: Effect of miR-1300 expression on proliferation and cell death in GSC cultures GBM1 and  
601 GBM4.

602 **a:** Cell cycle time course analyzed by flow cytometry using propidium iodide (PI) loading as a  
603 measure of DNA content. **b:** Cell death measured by flow cytometry where Annexin negative (An -),  
604 PI negative (PI-) = live cells, An+ PI- = early-mid apoptotic cells, An+ PI+ = mid-late apoptotic cells  
605 and An- PI+ = Necrotic cells. **c** and **d:** Binucleation phenotype scoring following staining with DAPI  
606 and Phalloidin Alexafluor488 (Actin) (3-6 images per condition, representing at least 100 cells) was  
607 performed on images taken on the Operetta imaging platform (x10 objective). All experiments were  
608 performed in triplicate. Results are normalized to a scrambled mimic control. Statistical significance  
609 is expressed as follows: \* =  $p < 0.05$ , \*\* =  $p < 0.01$ , \*\*\* =  $p < 0.001$  and \*\*\*\* =  $p < 0.0001$ .

610

611 Figure 3: Reduced ECT2 levels in response to miR-1300 expression is associated with cytokinesis  
612 failure in U251 and KNS42 cell lines

613 **a:** Transfection with ECT2 siRNA leads to an increase in binucleated cells. Binucleation phenotype  
614 scoring (3-6 fields of view (FOV) per condition, representing at least 100 cells) was performed on  
615 images taken on the Operetta imaging platform (x10 objective). **b:** Immunofluorescence images  
616 comparing the actin and alpha-tubulin staining in U251 and KNS42 cells 72h following transfection  
617 with 100nM of either miR-1300 or ECT2 siRNA showing both the common effect on binucleation  
618 (DAPI, blue) and the comparative differences in actin (Phalloidin) and  $\alpha$ -tubulin structures  
619 (Alexafluor488, green). Scale bar = 100 $\mu$ m. **c:** Ectopic expression of miR-1300 leads to decreased  
620 expression of ECT2 at the protein level. **d:** Confirmation of ECT2 knock-down at the protein level (by  
621 WB) following transfection with ECT2 siRNA smartpool. All experiments were performed in  
622 triplicate. Results were normalized to a scrambled mimic control. Statistical significance is expressed  
623 as follows: \*\* =  $p < 0.01$ , \*\*\*\* =  $p < 0.0001$ . NB: Blot images were taken at 48h time point since at

624 72h, cells in control conditions have reached confluence, and were not expressing ECT2 anymore as  
625 they are not dividing.

626

627 Figure 4: ECT2 is a direct target of miR-1300.

628 Direct targeting assessed by 3'UTR luciferase assay in the KNS42 cells **(a)** and GBM1 GSCs **(b)**. 3'  
629 ECT2 represents the wild-type 3'UTR sequence, 3'ECT2-mt represents the 3'UTR sequence  
630 containing two point-mutations in the predicted binding site for the miR-1300 seed sequence. . C and  
631 d: Ectopic expression of ECT2 rescues miR-1300 induced cytokinesis failure. Binucleation phenotype  
632 scoring (3-6 FOV per condition, representing at least 100 cells) was performed on images taken on the  
633 Operetta imaging platform (x10 objective) in KNS42 **(c)** and GBM1 **(d)**. All experiments were  
634 performed in triplicate. Results are normalized to the double control: "MIM control + Control vector"  
635 representing the scrambled mimic combined with the empty vector devoid of the ECT2 expression  
636 cassette. Statistical significance is expressed as follows: \*\* =  $p < 0.01$  and \*\*\*\* =  $p < 0.0001$ .

637

638 Figure 5: Exposure of synchronised CMK cells to SU6656 concomitantly induces an increase in the  
639 levels of miR-1300 and a decrease of its targets, ECT2

640 **(a)**. Cells were synchronised using Monastrol 25 $\mu$ M for 24h prior to exposure to SU6656 5 $\mu$ M. **(b)**  
641 Increase in multinuclear megakaryocytic cells (MKC) as a result of endomitosis undergone by  
642 megakaryoblastic cells (MKB) was measured by immunofluorescence in response to SU6656. Cells  
643 were stained with DAPI and TOTO-3. Nine fields of view were analysed using an algorithm designed  
644 in the Columbus software to discriminate objects based on their size **(b)**. Statistical significance is  
645 expressed as follows: \* =  $p < 0.05$ , \*\* =  $p < 0.01$ , \*\*\* =  $p < 0.001$  and \*\*\*\* =  $p < 0.0001$ .

646

647 Figure 6: Ectopic expression of miR-1300 specifically affects stem-like cells but not their  
648 differentiated counterparts.

649 (a) Effect on the cell cycle was analyzed by flow cytometry 120h post-transfection using Propidium  
650 Iodide (PI) loading as a measure of DNA content. (b) Cell death measured also 120h post-transfection  
651 by flow cytometry where Annexin negative (An -), PI negative (PI-) = live cells, An+ PI- = early  
652 apoptotic cells, An+ PI+ = mid/late apoptotic cells and An- PI+ = Necrotic cells. (c) Binucleation  
653 phenotype scoring (3-6 images per condition, representing at least 100 cells) was performed on  
654 images taken on the Operetta imaging platform (x10). All experiments were performed in triplicate.  
655 Results are normalized to a scrambled mimic control without BMP4 exposure. Statistical significance  
656 is expressed as follows: \* =  $p < 0.05$ , \*\* =  $p < 0.01$ , \*\*\* =  $p < 0.001$  and \*\*\*\* =  $p < 0.0001$ .

657

658



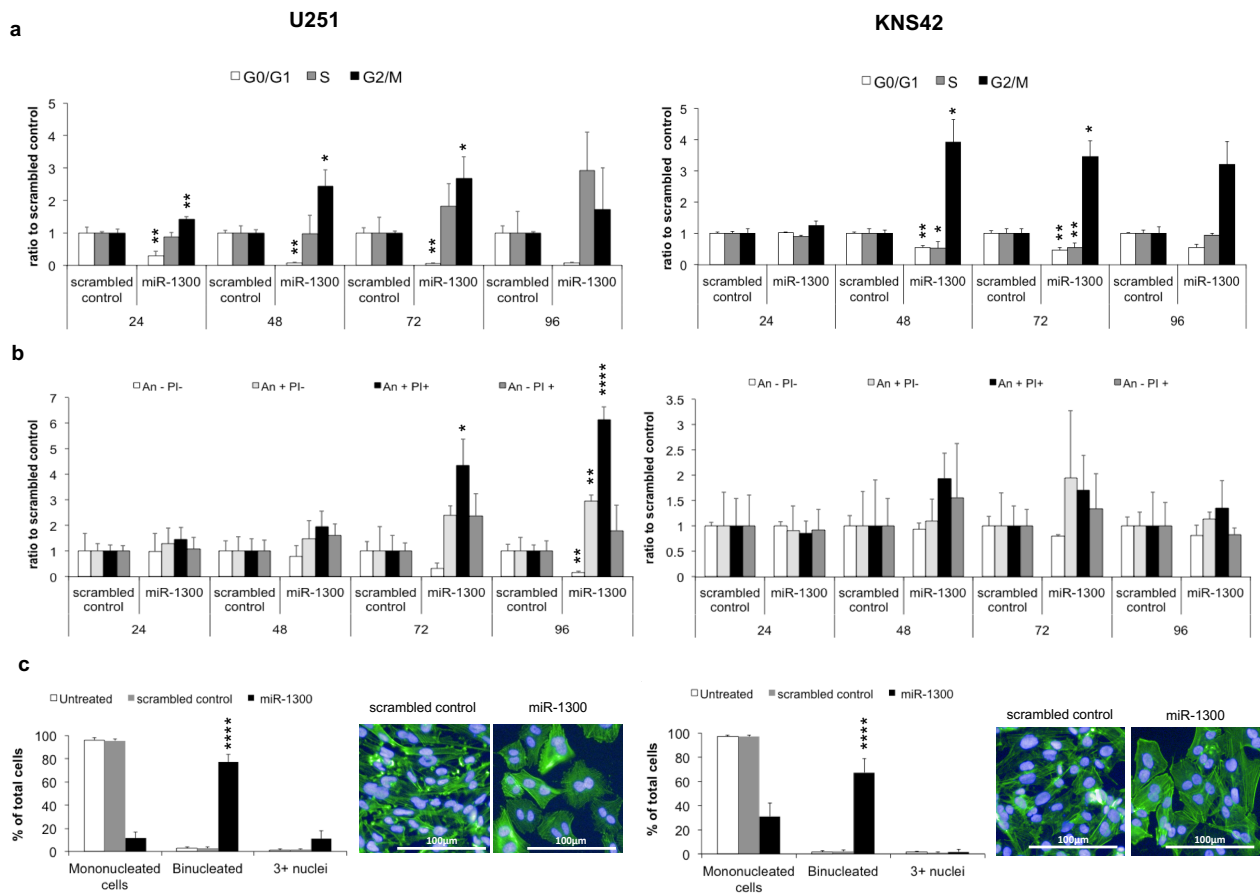

Figure 1: Effect of miR-1300 expression on proliferation and cell death in U251 and KNS42 cell lines.

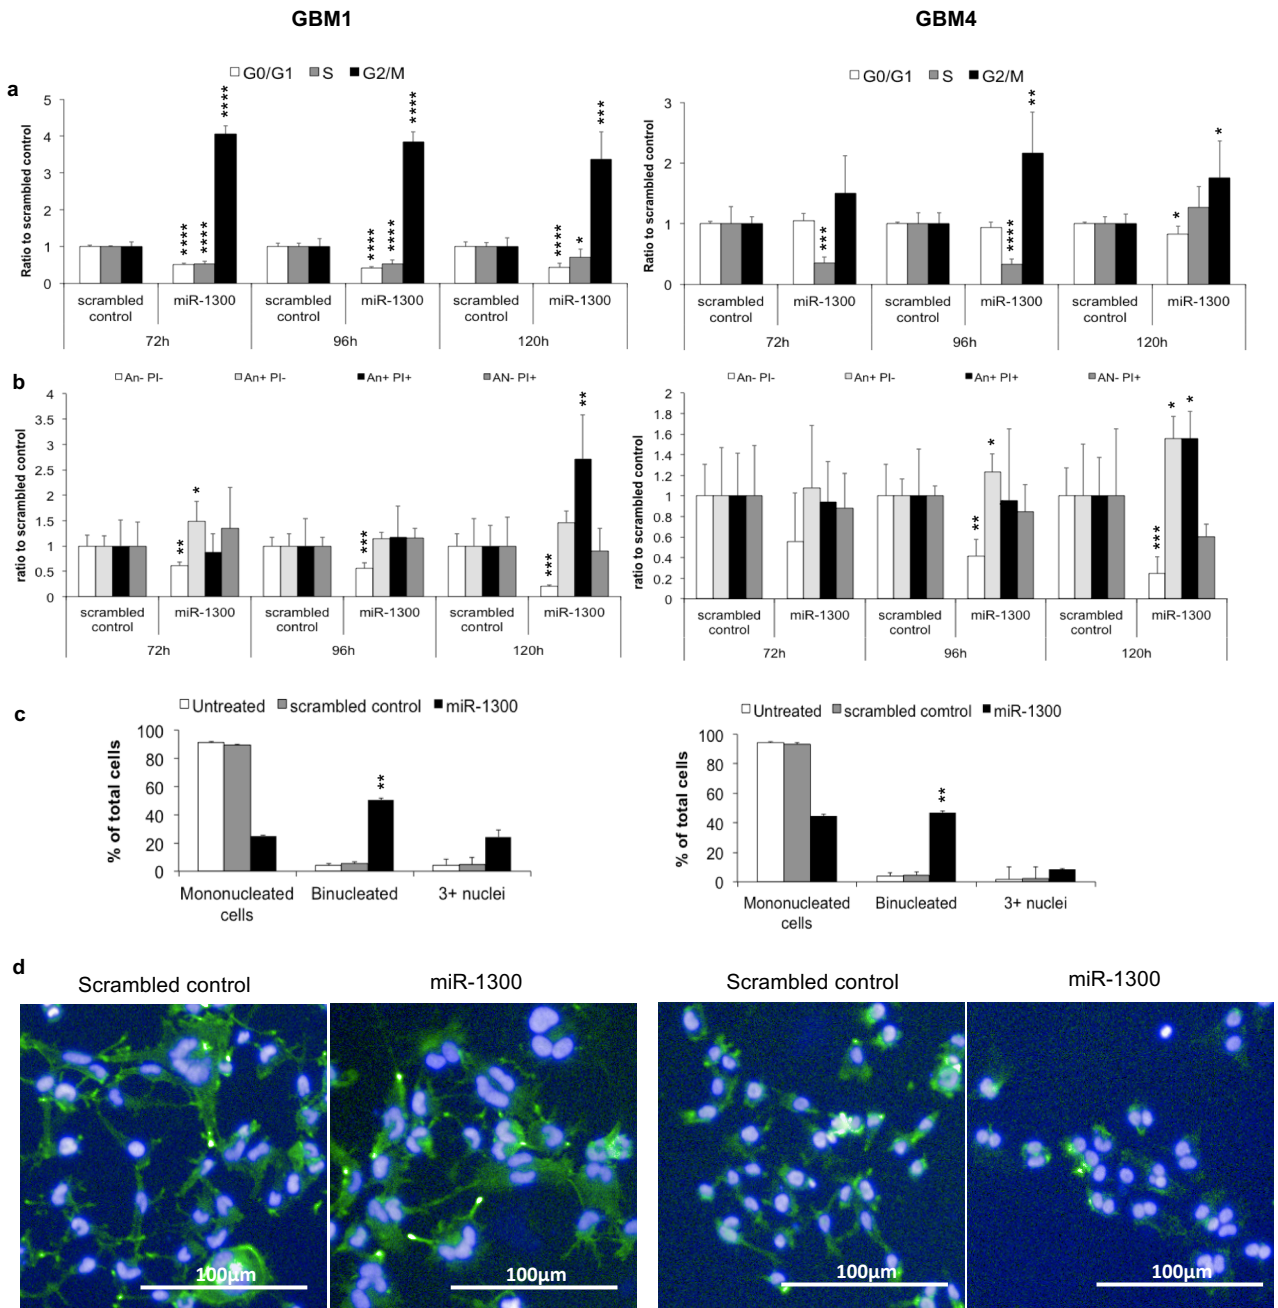

Figure 2: Effect of miR-1300 expression on proliferation and cell death in GSC cultures GBM1 and GBM4

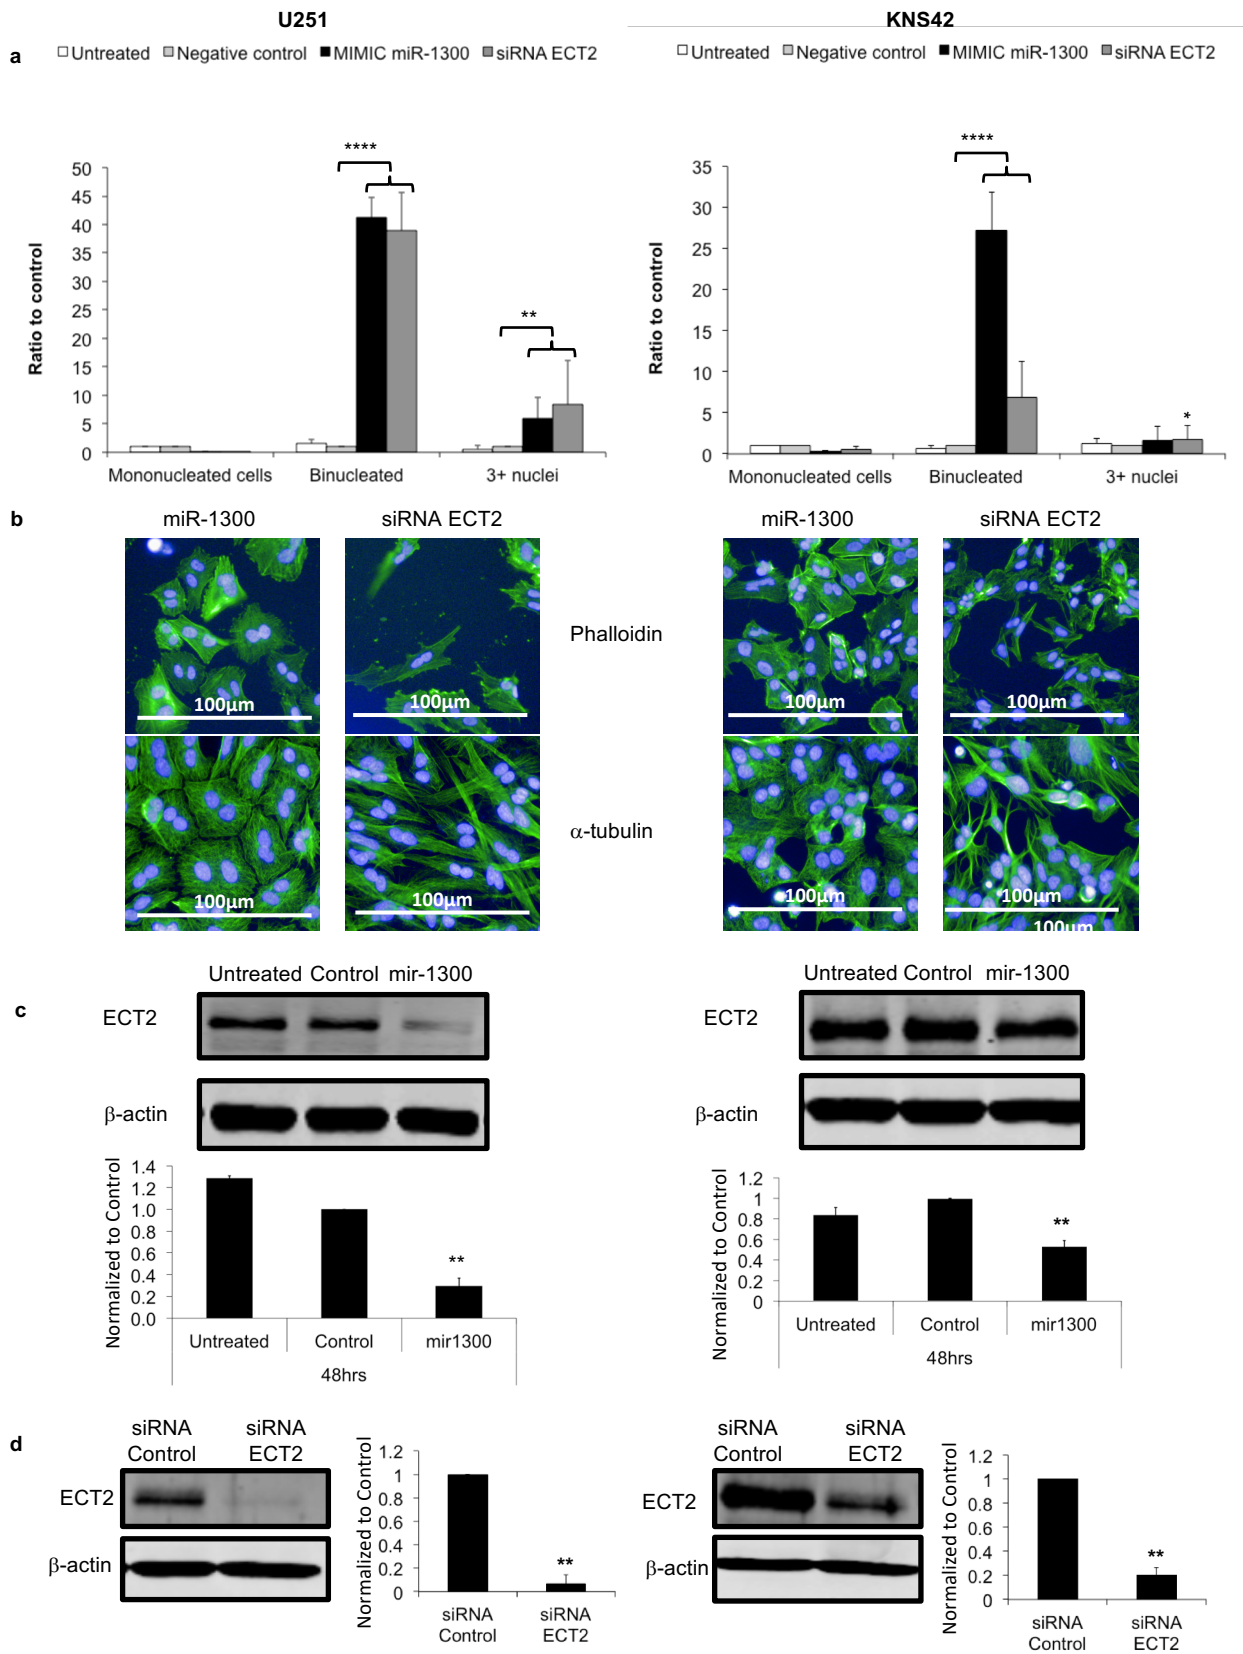

Figure3: ECT2 as a likely target of miR-1300 leading to cytokinesis failure in U251 and KNS42 cell lines

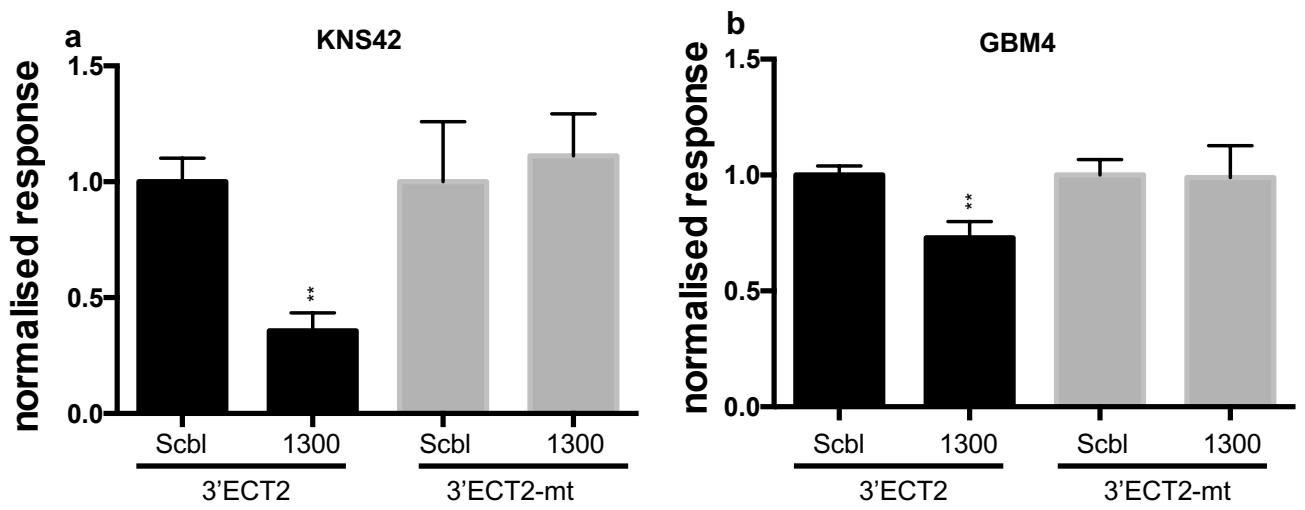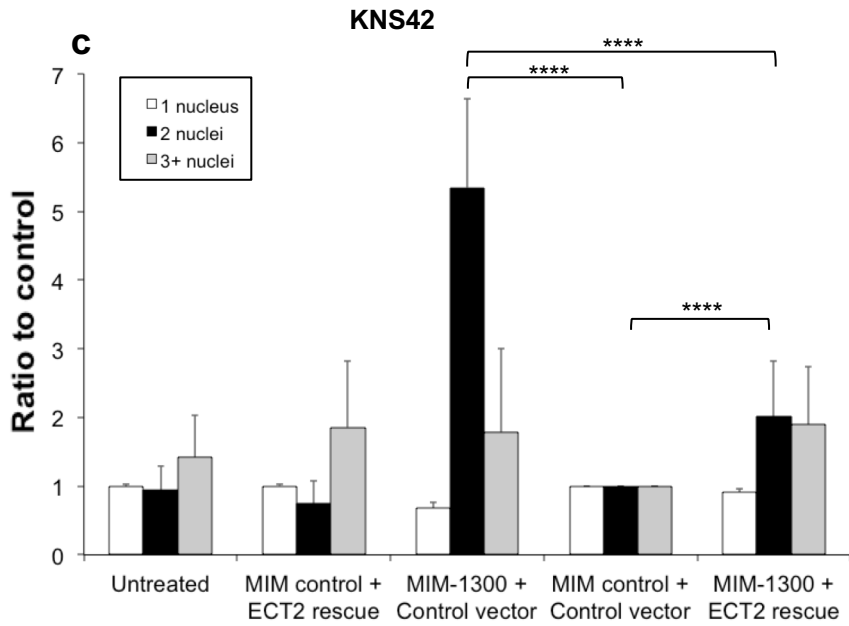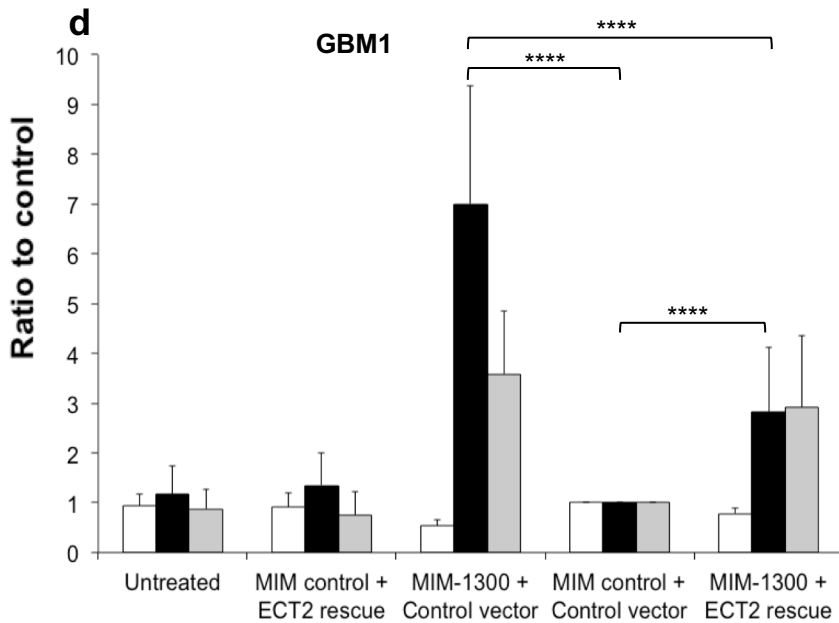

Figure 4: ECT2 is a direct target of miR-1300.

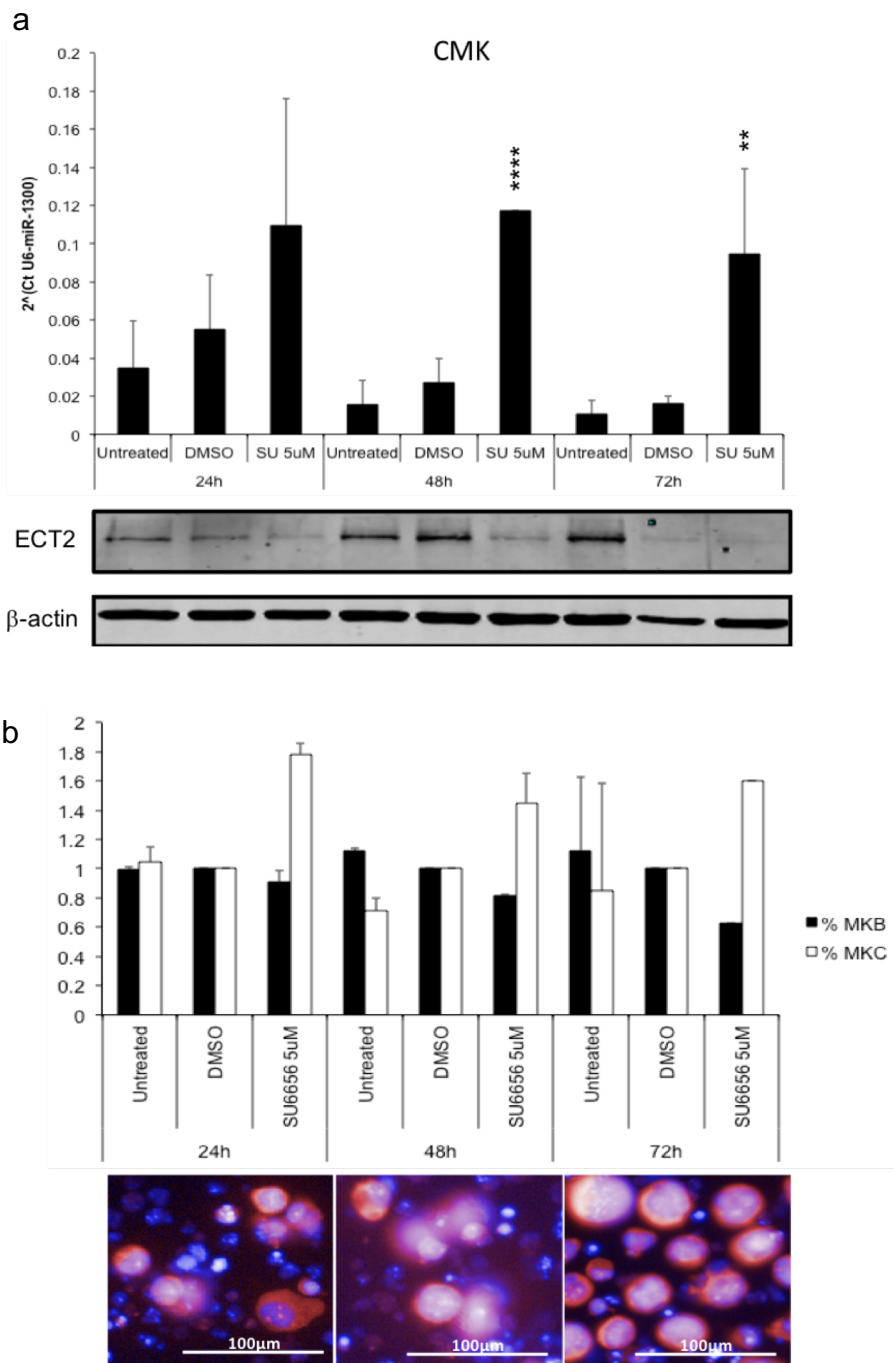

Figure 6: Exposure of synchronised CMK cells to SU6656 concomitantly induces an increase in the levels of miR-1300 and a decrease of its targets, ECT2

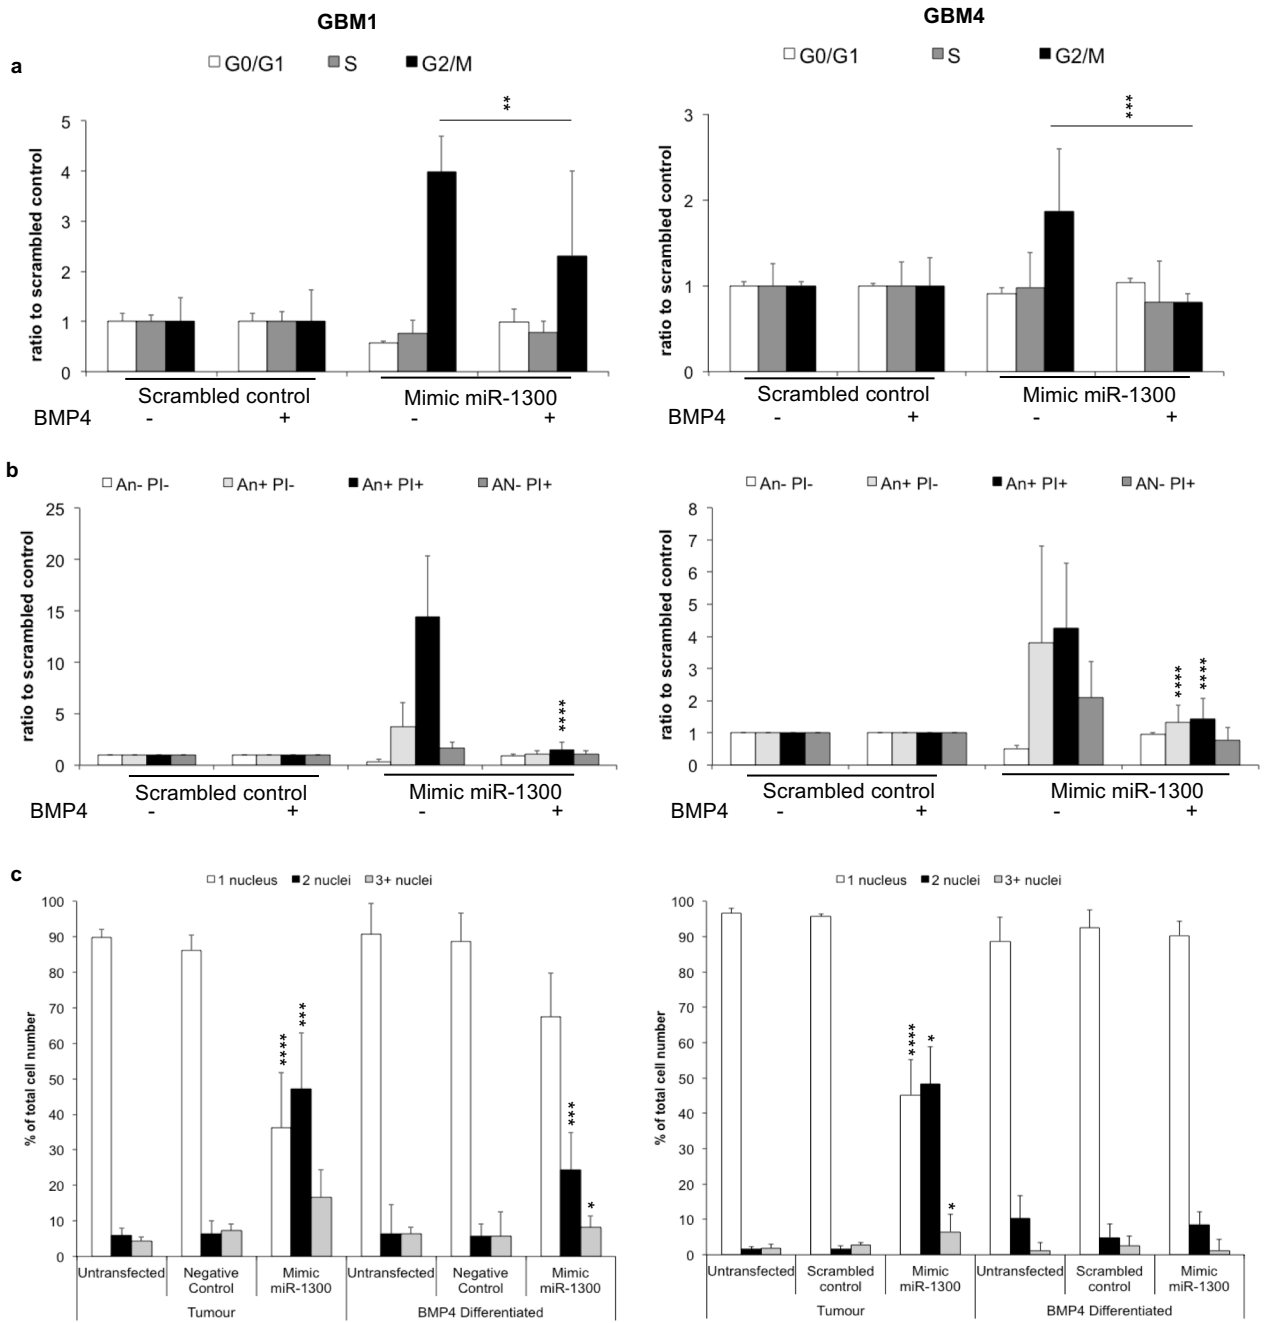

Figure 7: Ectopic expression of miR-1300 specifically affects stem-like cells but not their differentiated counterparts
